# Supplementary material for: Responses of seed germination and shoot metabolic profiles of maize (Zea maysL.) to Y2O3nanoparticle stress
Source: Royal Society of Chemistry journal article supplement (doi:10.1039/c9ra04672k), 2019-01-01
Supplement: c9ra04672k1.pdf [file c9ra04672k1.pdf]

## Responses of seed germination and shoot metabolic profiles of maize (*Zea mays* L.) to $Y_2O_3$ nanoparticles stress

Chenchen Gong, Linghao Wang, Xiaolu Li, Hongsen Wang, Yuxin Jiang and Wenxing Wang\*

College of Life and Health Sciences, Northeastern University, Shenyang 110819, China.

E-mail: wangwenxing@126.com ; [wangwenxing@mail.neu.edu.cn](mailto:wangwenxing@mail.neu.edu.cn)

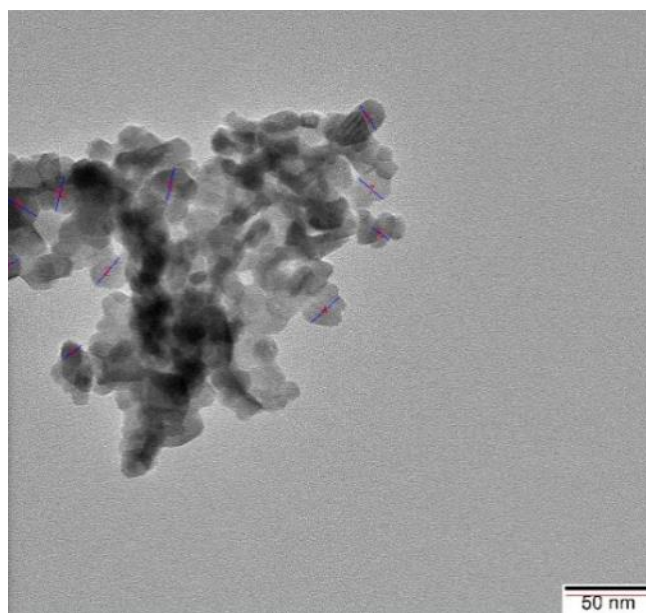

Fig. S1 TEM image of  $Y_2O_3$  NPs

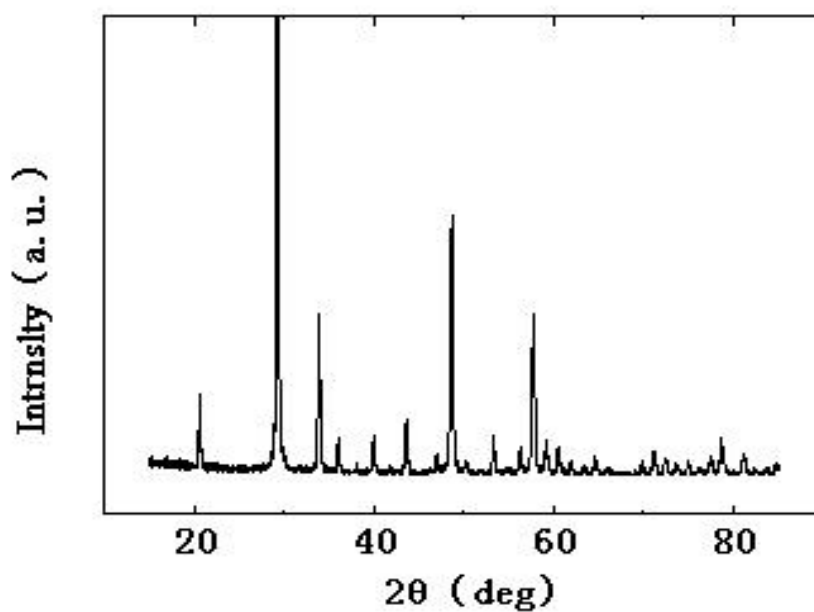

Fig. S2 XRD pattern of  $Y_2O_3$  NPs
